# Supplementary material for: Protective Effect of Genistein against Compound 48/80 Induced Anaphylactoid Shock via Inhibiting MAS Related G Protein-Coupled Receptor X2 (MRGPRX2)
Source: PubMed Central journal article supplement (PMC7179155; doi:10.3390/molecules25051028), 2020-02-25
Supplement: molecules-25-01028-s001.pdf [file molecules-25-01028-s001.pdf]

# Protective effect of Genistein against compound 48/80 induced anaphylactoid shock via inhibiting MAS related G protein-coupled receptor X2 (MRGPRX2)

Mukesh Kumar<sup>1</sup>, Kailash Singh<sup>1</sup>, Karthi Duraisamy<sup>1</sup>, Ahmed A Allam<sup>2</sup>, Jamaan Ajarem<sup>3</sup>, Billy Kwok Chong CHOW<sup>1\*</sup>

Figure S1.

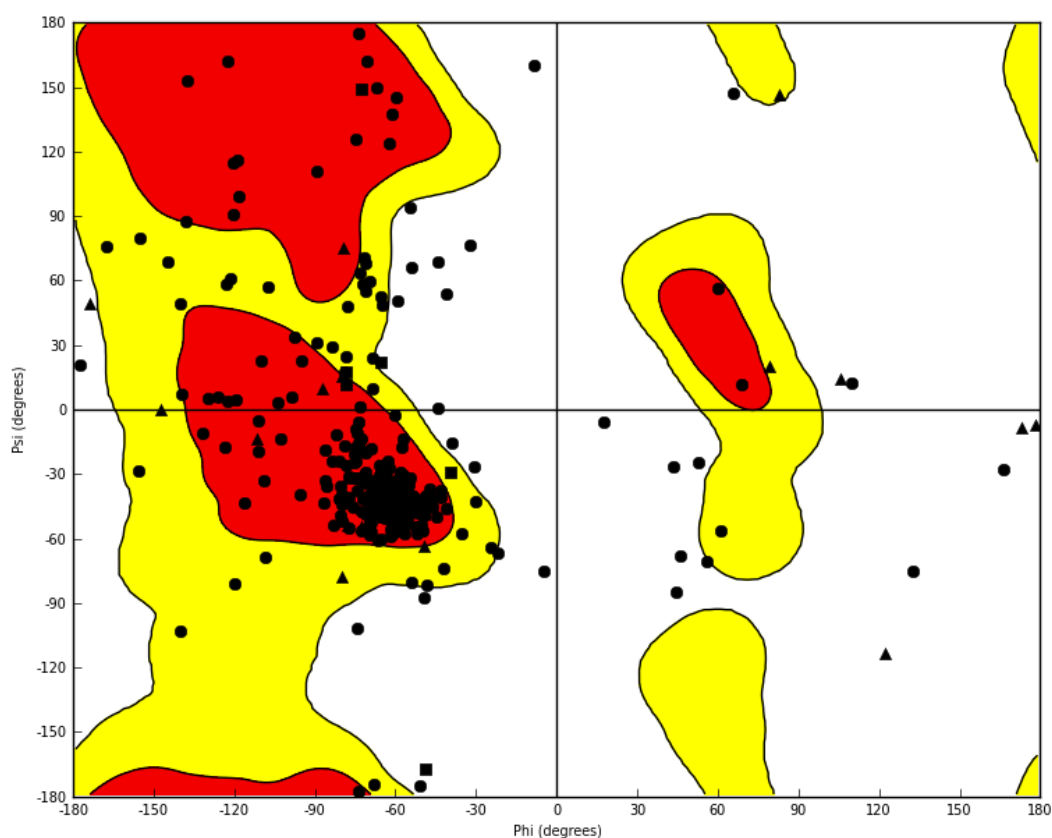

Figure S1. Ramachandran plot depicting 99.3% residues in favored and allowed region with only 2 amino acid residues as outlier. The calculation was performed by the RAMPAGE: Assessment of Ramachandran Plot.

Figure S2.

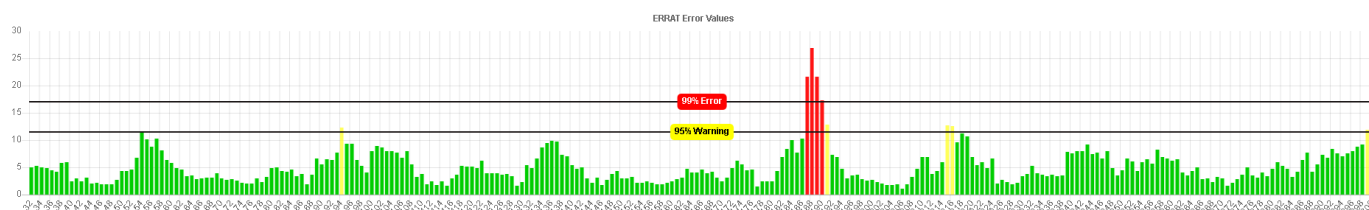

Figure S2. ERRAT score helps in analyzing statistics of non-bonded interactions between different atom types. The model presented overall quality factor as 96.283. The calculation was made by the help of SAVES server.

Table S1: Depicts the sequence similarity, Z score, C score and ERRAT quality factor of selected template

| Sequence similarity | Query Coverage | Z Score | C Score | ERRAT Quality Factor |
|---------------------|----------------|---------|---------|----------------------|
| 30%                 | 84%            | 3.01    | 1.06    | 96.283               |
